# Supplementary material
Source: publisher figshare collection journal article supplement (https://tandf.figshare.com/ndownloader/files/5958780)
Supplement: Supplementary file 1 [file 5958780]

**Novel calix[4]arene based metallo-supramolecular complex for recognition of CN- ions in aqueous medium**

Mohammad Shahid, Har Mohindra Chawla and Pooja Bhatia

Department of Chemistry, Indian Institute of Technology Delhi,

Hauz Khas, New Delhi-110 016

**Material and Methods:**

All the reagents and solvents were purchased from Merck and Sigma-Aldrich and were used without any further purification. IR spectra in KBr were recorded on Agilent/ Perkin Elmer FT-IR spectrometer. 1H NMR spectra (chemical shifts in δ ppm) were recorded on a Bruker 300 FT–NMR (300 MHz) spectrometer, using TMS as internal standard. The UV-Vis absorption spectra were recorded on Perkin Elmer Lambda 35 spectrophotometer using a quartz curette (path length = 1 cm). Fluorescence spectra were recorded on a Horiba Fluoromax 4 spectrophotometer. HRMS were recorded on Brukar MICROTOF Q II in aqueous acetonitrile.

The fluorescence titration data were employed to estimate the binding affinity for 1:1 and 1:2 stoichiometry by modified Benesi-Hildebrand method employing equations given below--

**1/(*I* - *Io*) = 1/(*I* - *I*f) + 1/K (*I* - *I*f) [M] (1)**

**1/(*I* - *Io*) = 1/(*I* - *I*f) + 1/K (*I* - *I*f) [M]2 (1I)**

Where, K is the association constant, *I* is fluorescence intensity/absorbance of free receptor **4**, *I*o is the observed fluorescence intensity/absorbance of complex, **4-Cu2+** and *I*f is the fluorescence intensity/absorbance at saturation.


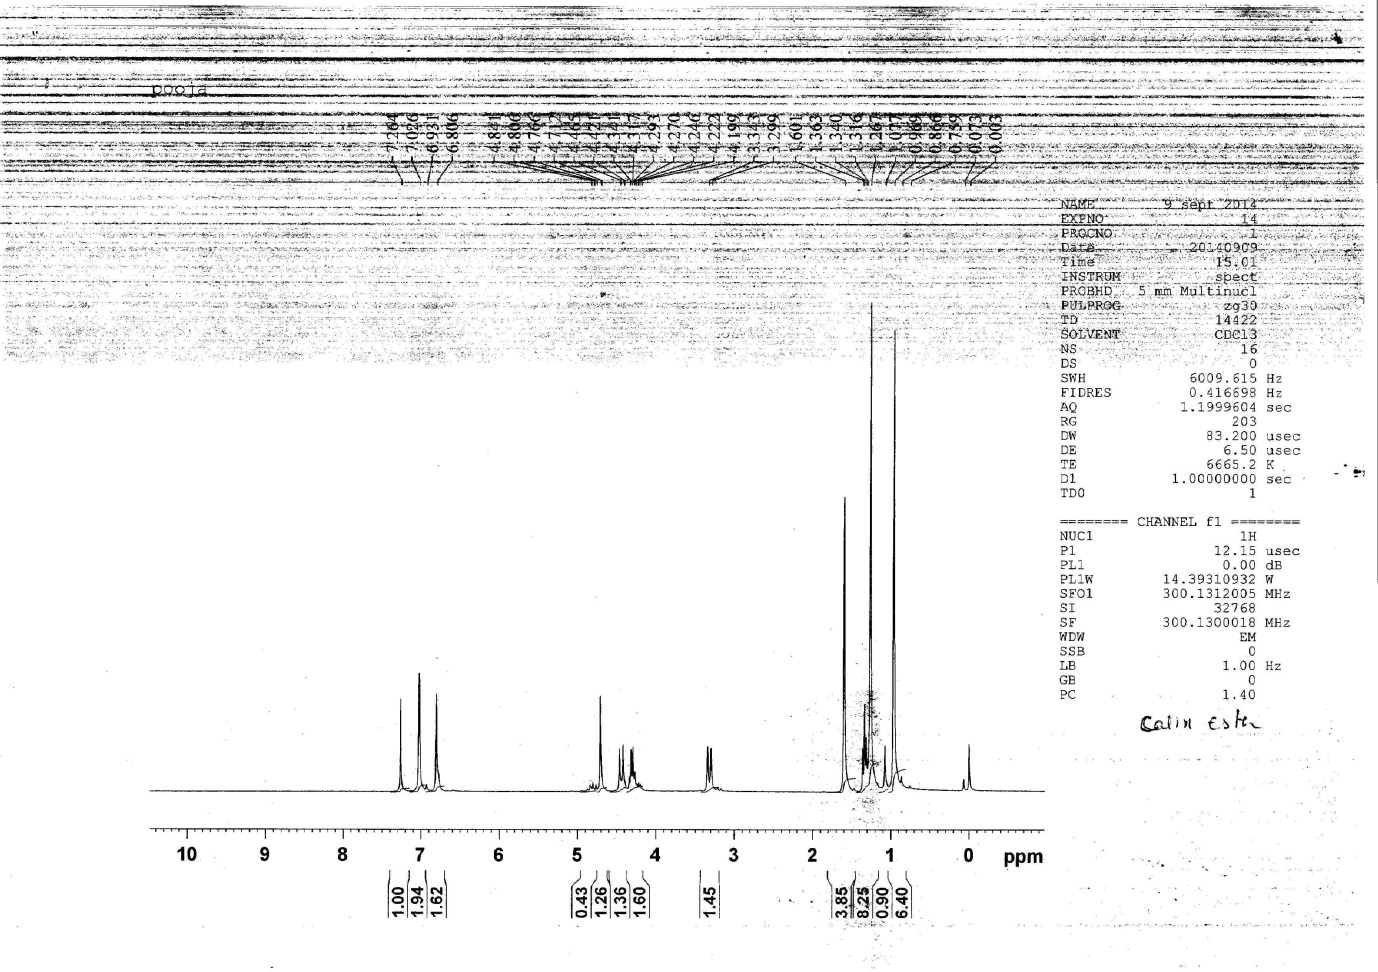


**Figure S1:** 1H NMR spectrum of compound **2** in CDCl3.


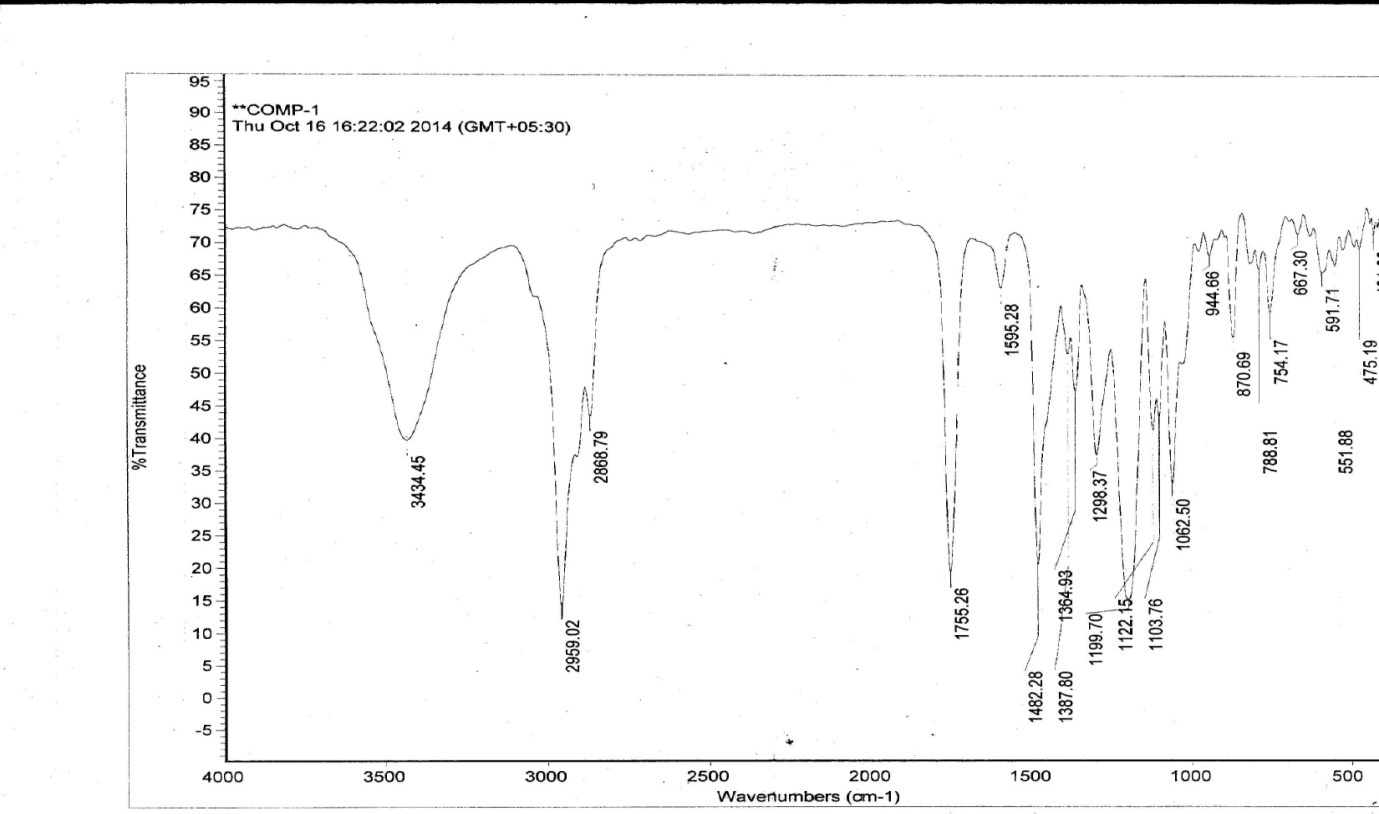


**Figure S2:** FT-IR spectrum of compound **2**.


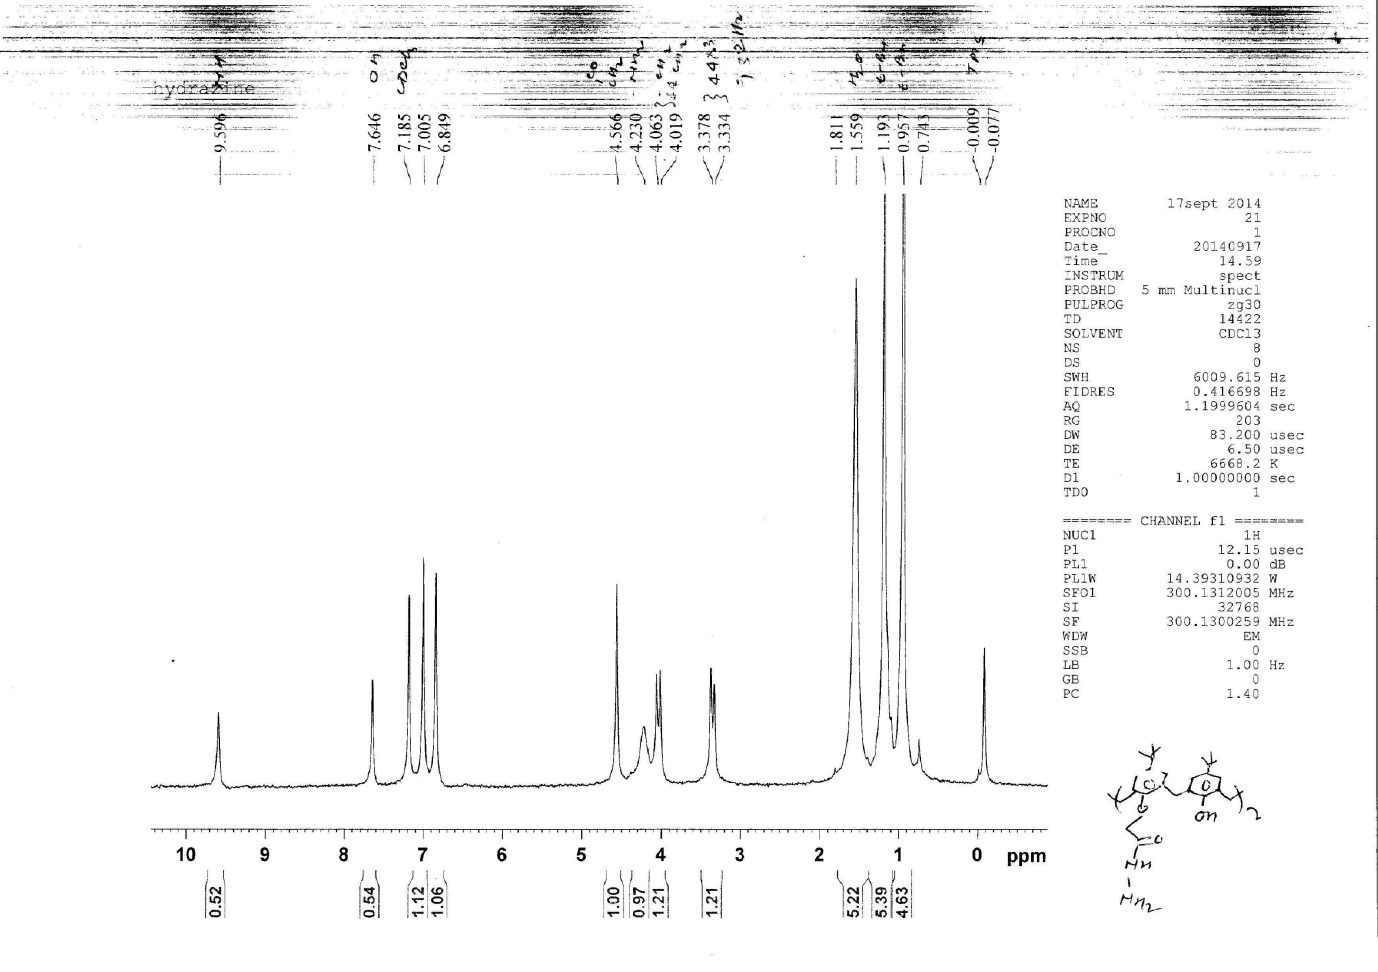


**Figure S3:** 1H NMR spectrum of compound **3** in CDCl3.


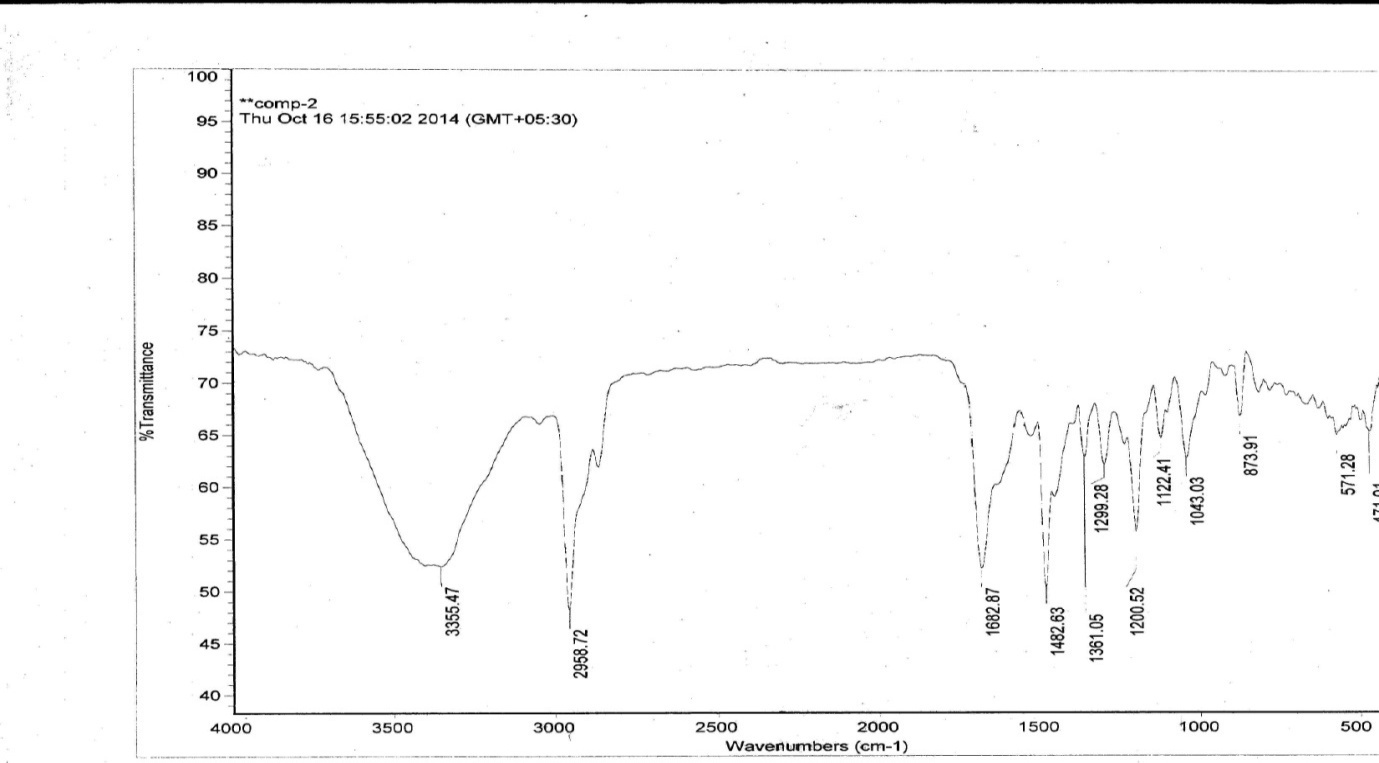


**Figure S4:** FT-IR spectrum of compound **3**.


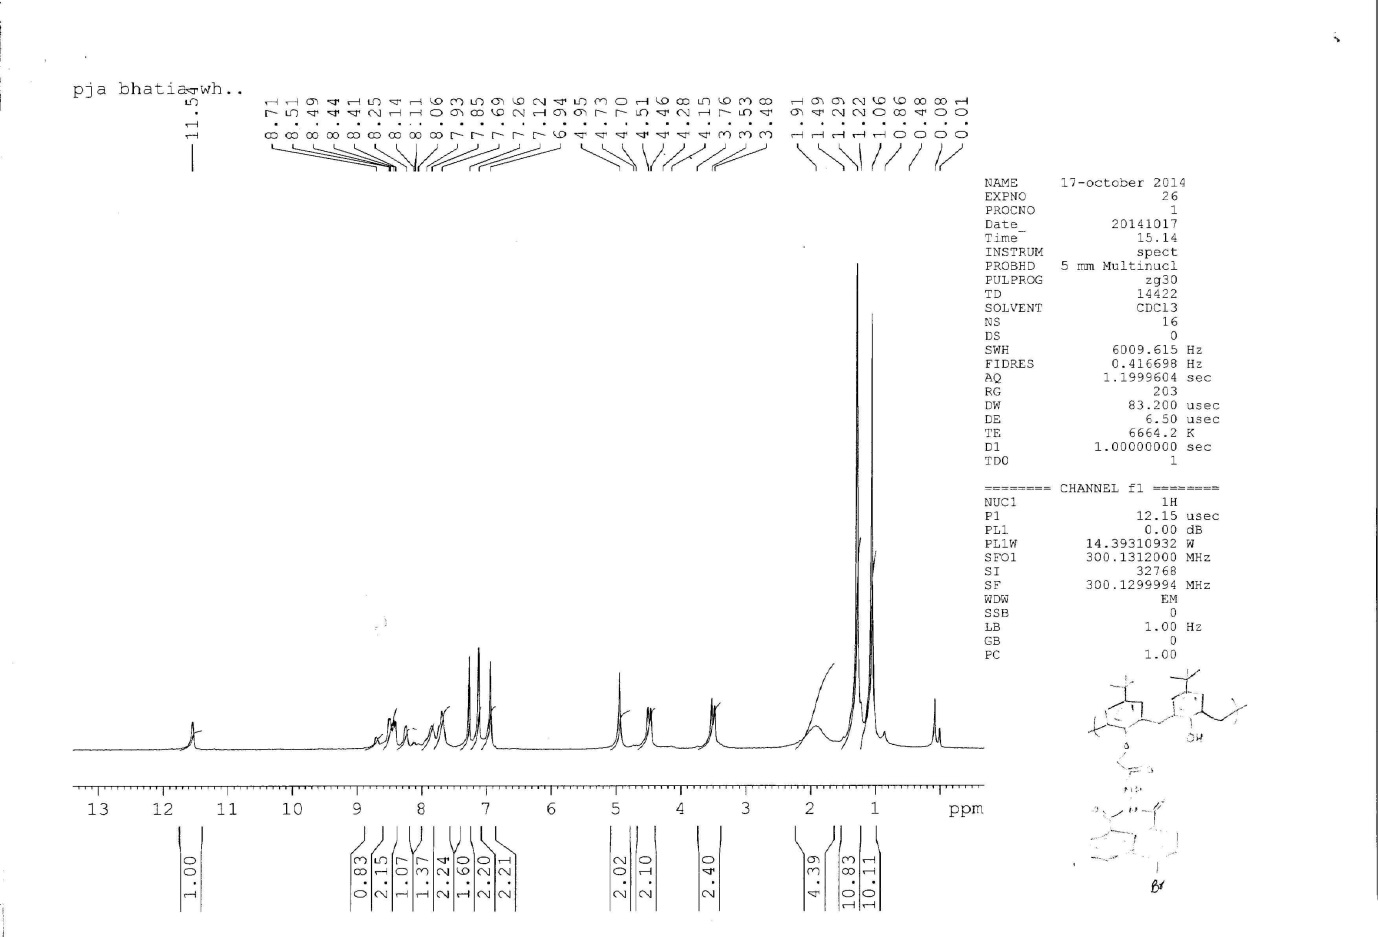


**Figure S5:** 1H NMR spectrum of compound **4** in CDCl3.


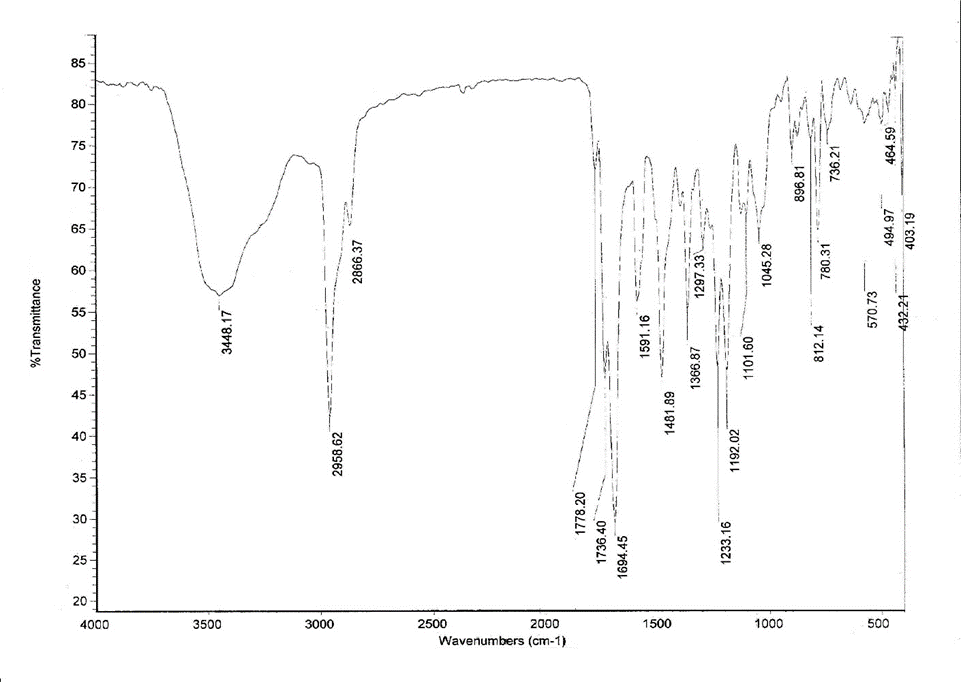


**Figure S6:** FT-IR spectrum of compound **4**.


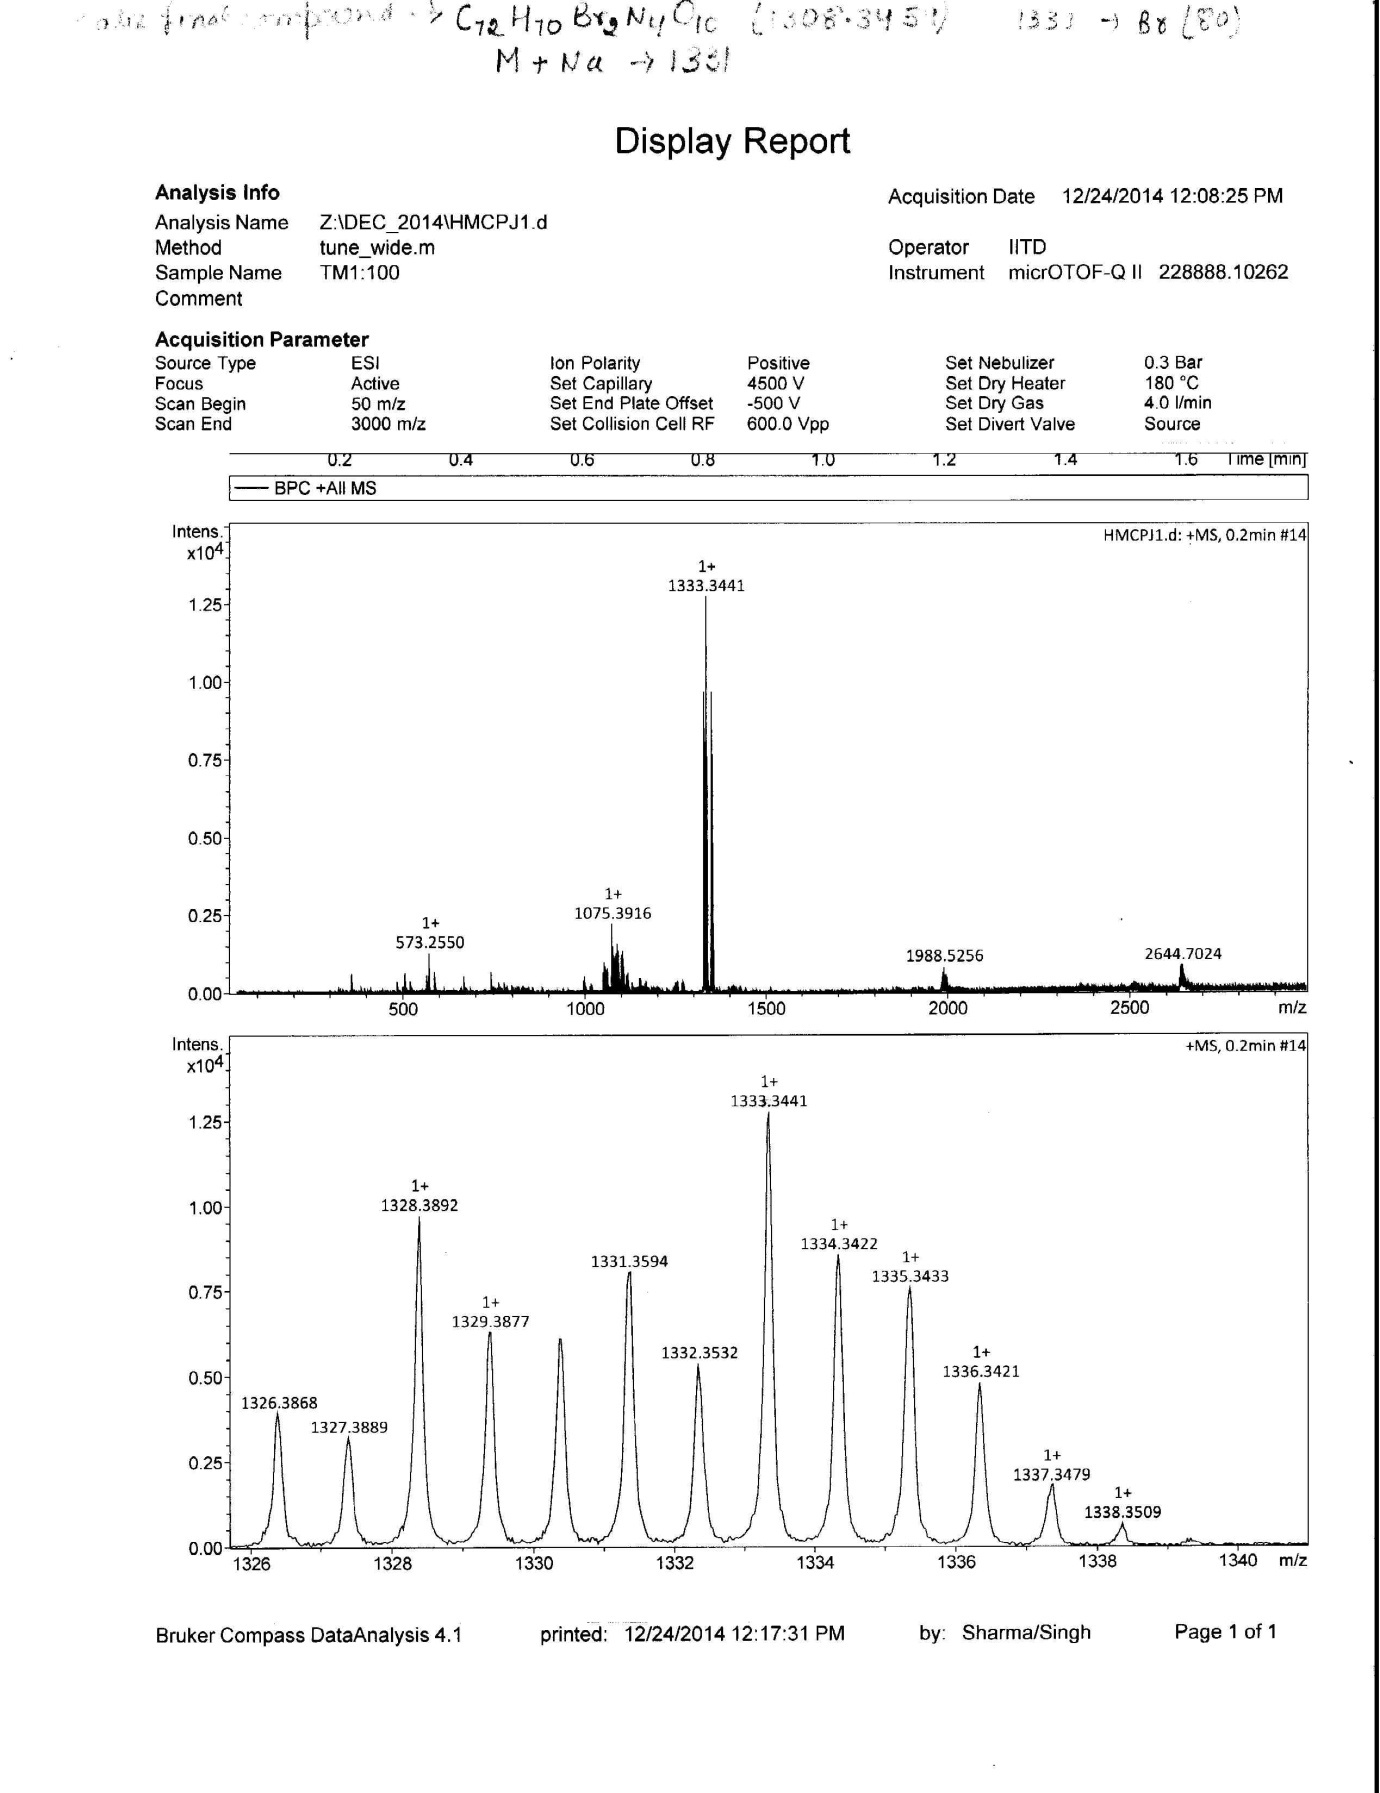


**Figure S7:** HRMS mass spectrum of compound **4.**

**Figure S8:** Interference studies on **4** with different metal ions (20 equiv) in aqueous-acetonitrile solution (20%, v/v).


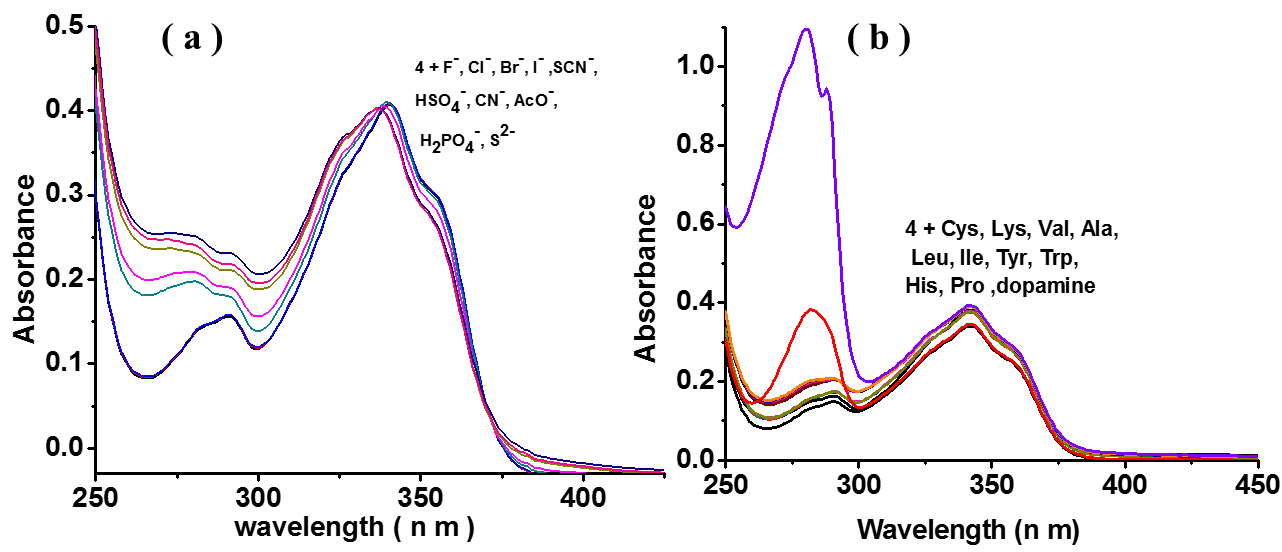


**Figure S9:** Interaction of **4** (10 µM) with different (a) anions (20 equiv) and (b) amino acids (20 equiv) in aqueous-acetonitrile solution (20%, v/v).


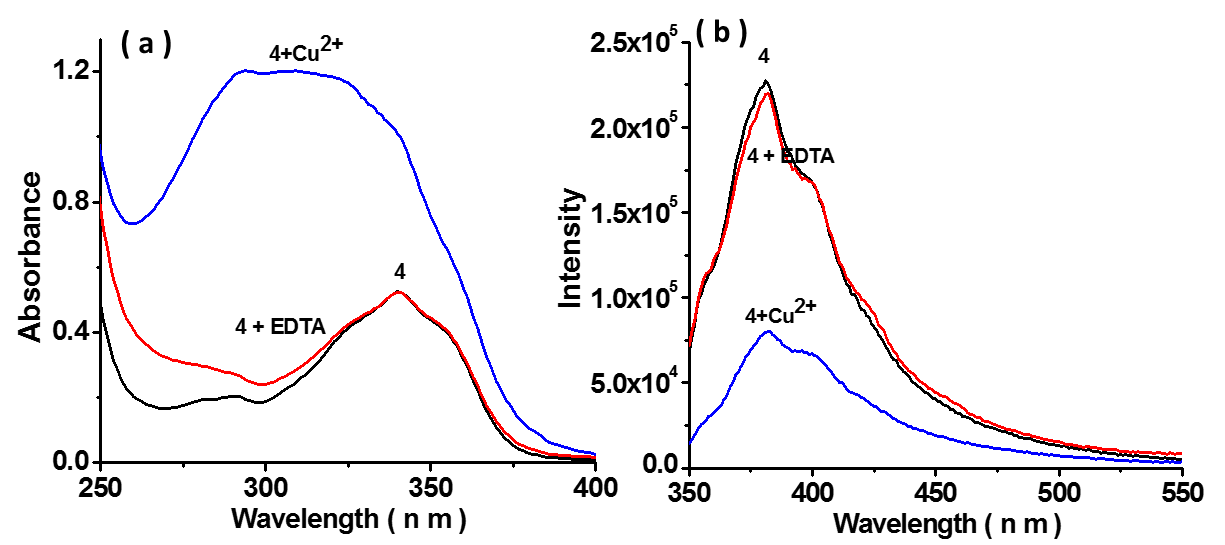


**Figure S10:** Re-usability of **4**, **4**-Cu2+ on treatment with EDTA in aqueous-acetonitrile solution (20%).

**
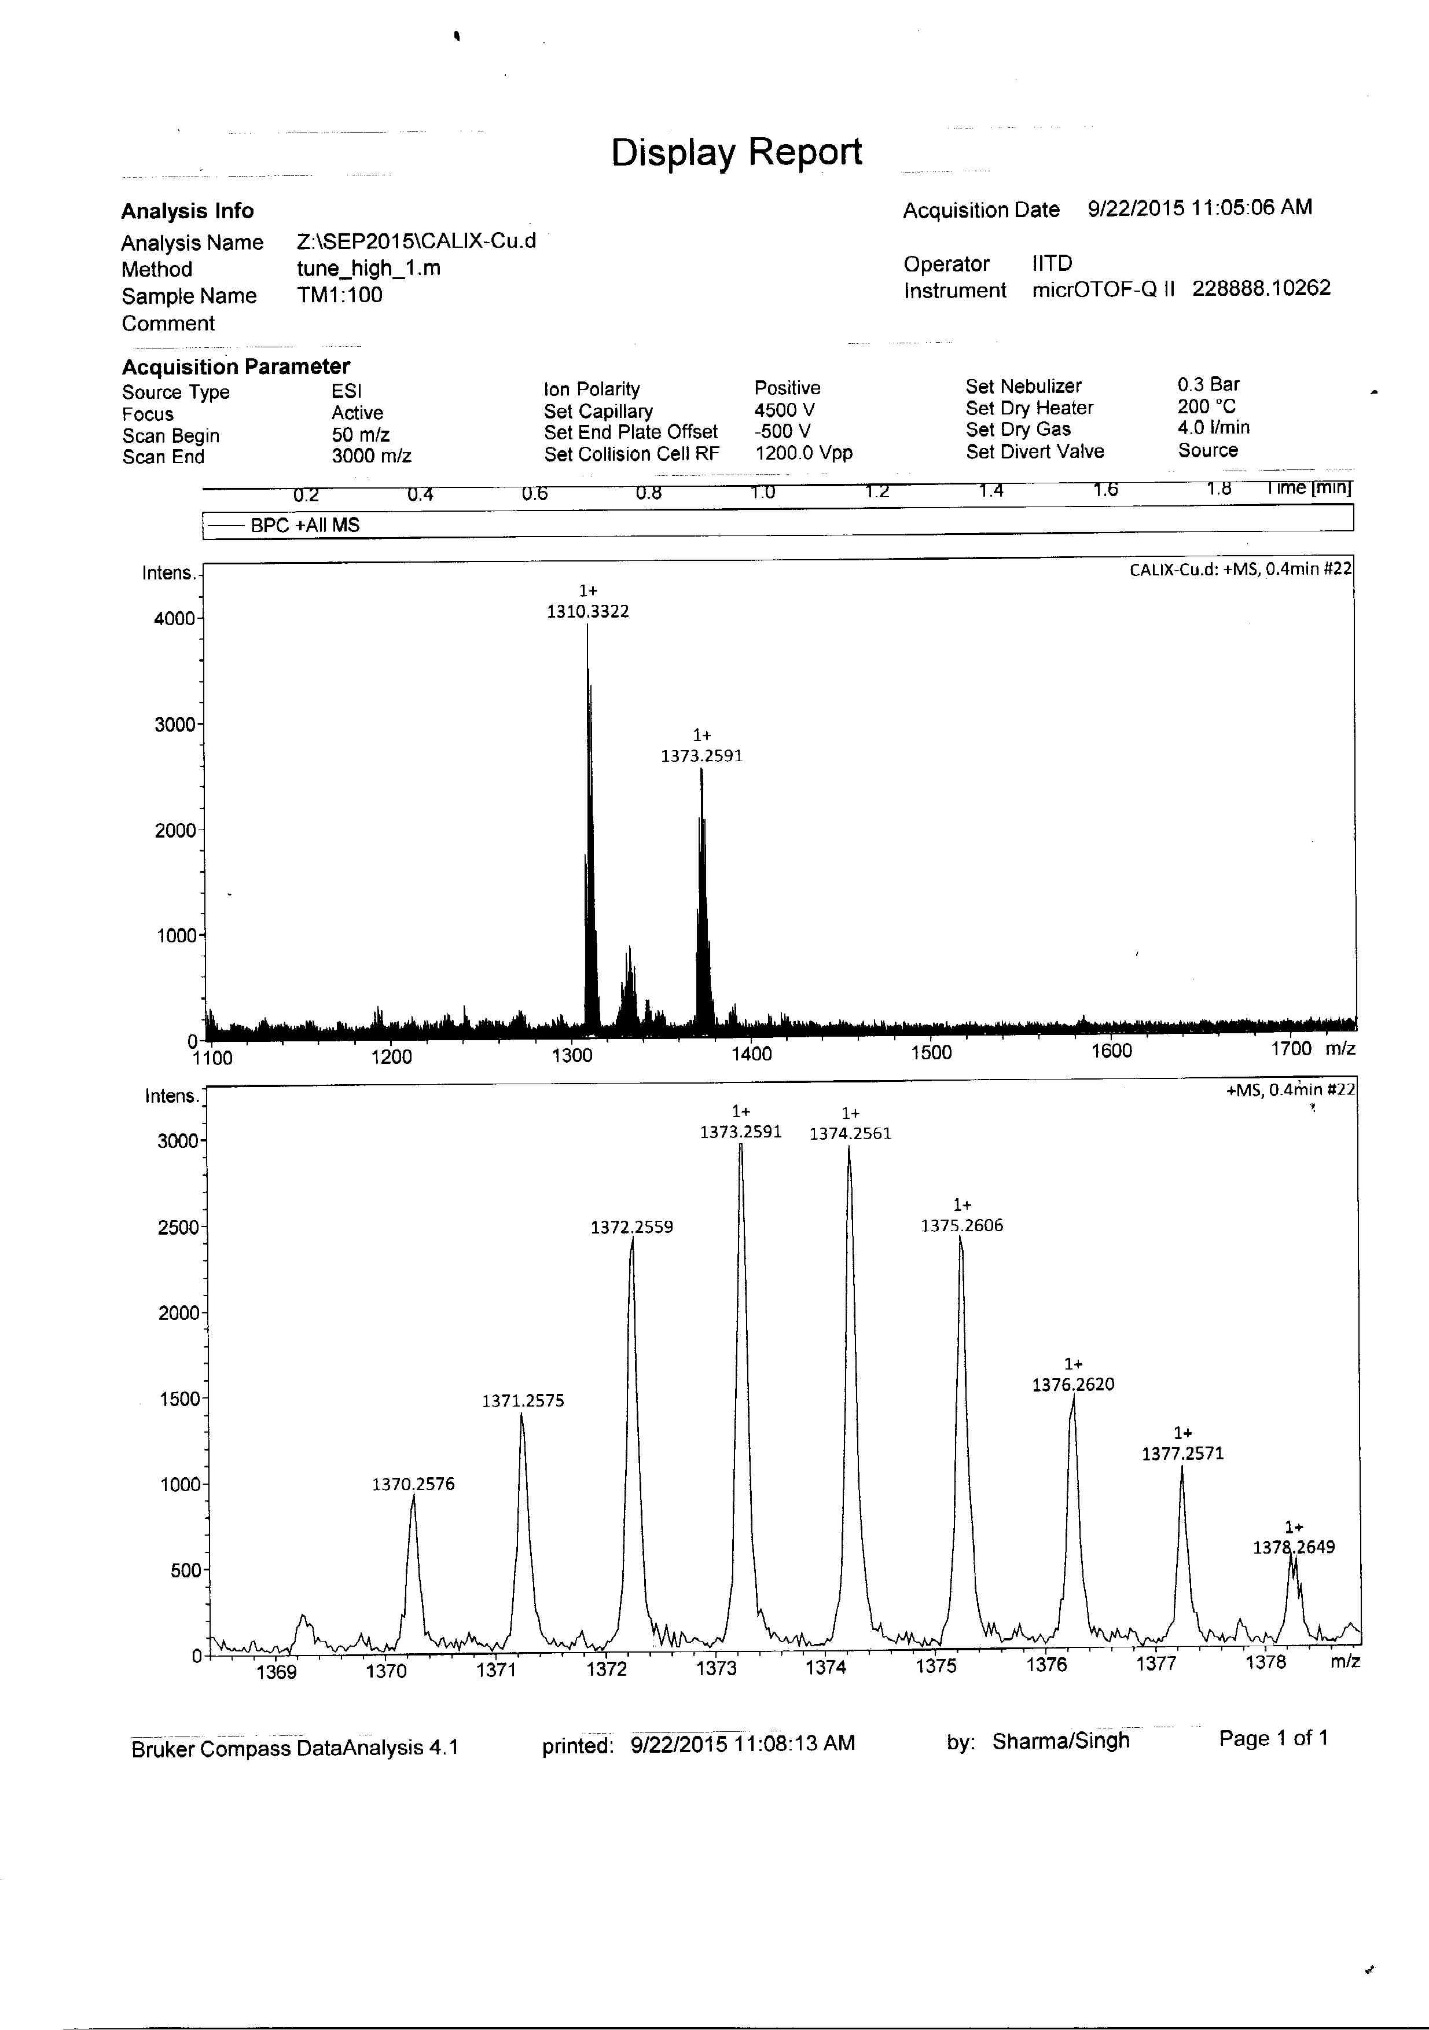
**

**Figure S11:** HRMS spectrum of **4-Cu2+** which showed the molecular ion peak at m/z 1373.2591; 1371.2575, calculated for [C72H70Br2N4O10Cu]+ m/z = 1373.2834; 1371.2844.


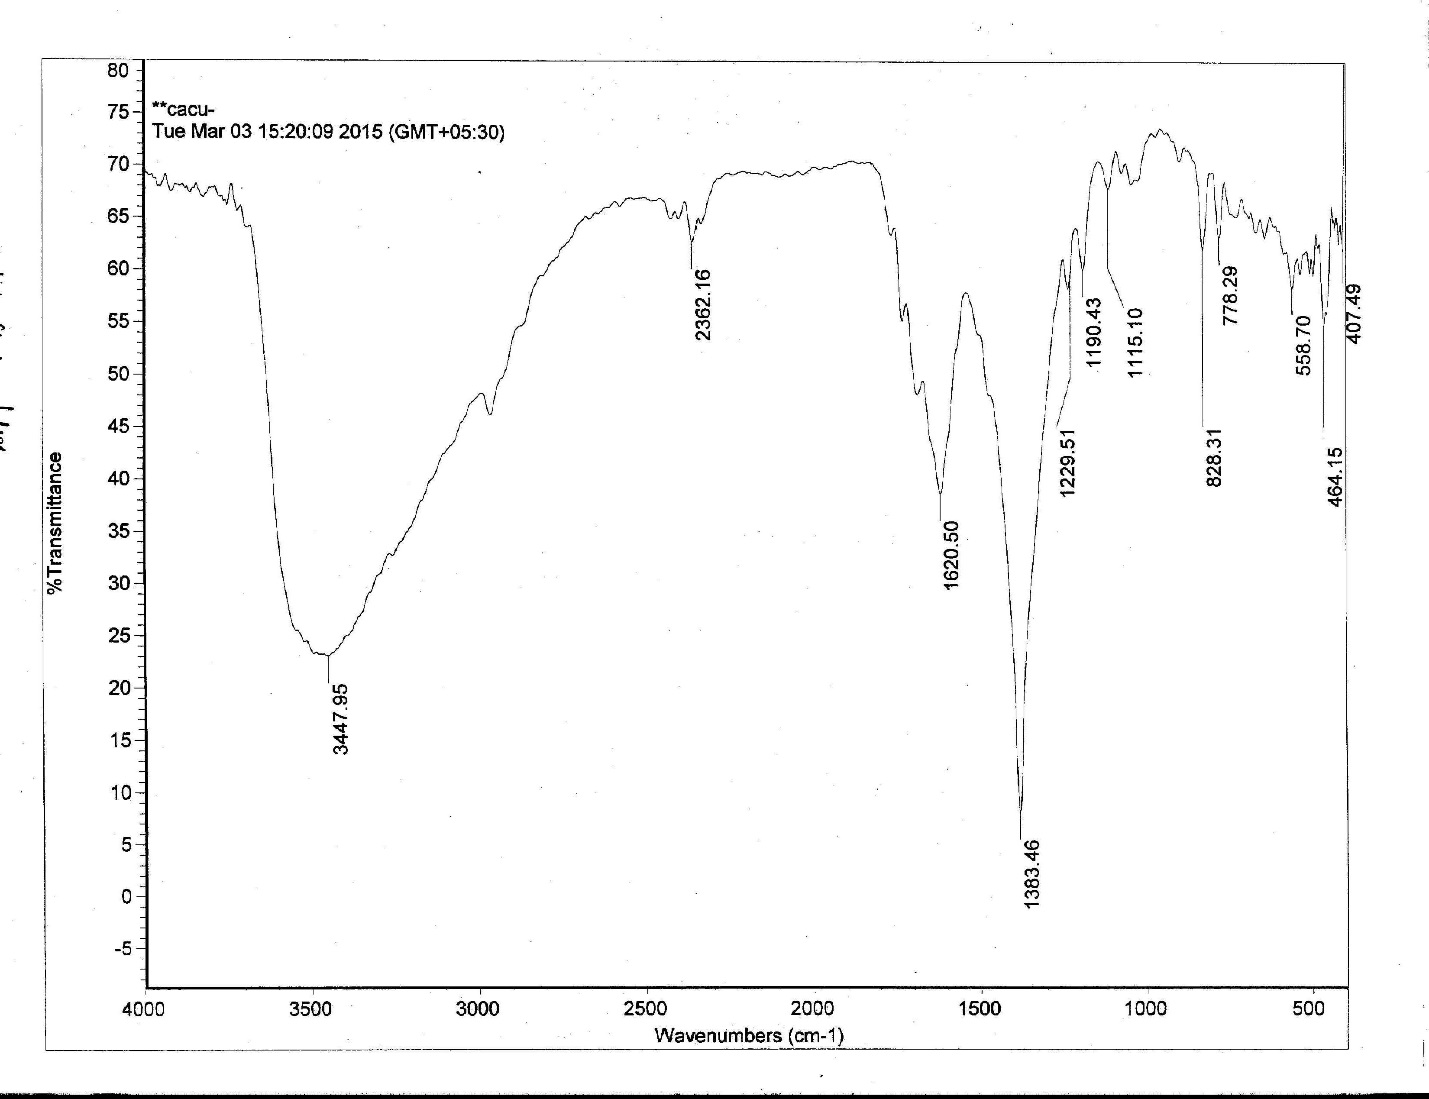


**Figure S12:** FT-IR spectrum of **4**-Cu2+ complex in KBr.

**Figure S13:** Interaction studies on **4-Cu2+** complex with different anions (20 equiv) in aqueous-acetonitrile solution (20%, v/v).

**Figure S14:** Fluorescence interaction of **4-Cu2+**with anions(20 equiv) in aqueous-acetonitrile solution (20%, v/v).
